# Supplementary material for: Enhanced oxygen evolution performance by the partial phase transformation of cobalt/nickel carbonate hydroxide nanosheet arrays in an Fe-containing alkaline electrolyte
Source: Royal Society of Chemistry journal article supplement (doi:10.1039/d1qi01558c), 2022-01-01
Supplement: d1qi01558c1.pdf [file d1qi01558c1.pdf]

**Enhanced oxygen evolution performance by partial phase  
transformation of cobalt/nickel carbonate hydroxide nanosheet  
arrays in Fe-containing alkaline electrolyte**

*Jinghua Liu<sup>a</sup>, Hualan Li<sup>b</sup>, Jiayang Cai<sup>b</sup>, Jingyan Liu<sup>c</sup>, Yansheng Liu<sup>a</sup>, Zijun Sun<sup>a</sup>, Xiong He<sup>a,c\*</sup>, Dezhi Qu<sup>b\*</sup>, Xin Li<sup>c\*</sup>*

*<sup>a</sup> Materials Science and Engineering Research Center, Guangxi University of Science and Technology, Liuzhou 545000, China*

*<sup>b</sup> Guangxi Key Laboratory of Green Processing of Sugar Resources, College of Biological and Chemical Engineering, Guangxi University of Science and Technology, Liuzhou 545006, China*

*<sup>c</sup> MIIT Key Laboratory of Critical Materials Technology for New Energy Conversion and Storage, School of Chemistry and Chemical Engineering, State Key Lab of Urban Water Resource and Environment, Harbin Institute of Technology, Harbin 150090, China.*

\*Corresponding author: Tel.: +86-0451-86282153.

E-mail address: [lixin@hit.edu.cn](mailto:lixin@hit.edu.cn) (X. Li), [hexiong@gxust.edu.cn](mailto:hexiong@gxust.edu.cn) (X. He), [qudezhi@gxust.edu.cn](mailto:qudezhi@gxust.edu.cn) (D. Qu).

## Table of content

|                                                                                                                                                                                                                                                                 |    |
|-----------------------------------------------------------------------------------------------------------------------------------------------------------------------------------------------------------------------------------------------------------------|----|
| <b>Table S1</b> The chemical components for the synthesis of electrocatalysts                                                                                                                                                                                   | 4  |
| <b>Fig. S1</b> XRD patterns of Co <sub>1</sub> Ni <sub>6</sub> CH before and after OER test.                                                                                                                                                                    | 4  |
| <b>Fig. S2</b> Elemental mapping images of Co <sub>1</sub> Ni <sub>6</sub> CH.                                                                                                                                                                                  | 5  |
| <b>Fig. S3</b> (a) Low-resolution TEM image, insert high-resolution TEM image, and (b-g) elemental smart maps of Co <sub>1</sub> Ni <sub>6</sub> CH after OER test.                                                                                             | 5  |
| <b>Table S2</b> The elemental composition of Co <sub>1</sub> Ni <sub>6</sub> CH before and after OER in KOH electrolyte from EDS spectra                                                                                                                        | 5  |
| <b>Fig.S4</b> XPS spectra of NiCH and Co <sub>1</sub> Ni <sub>6</sub> CH. (a) XPS survey spectra, and (b) Ni 2p.                                                                                                                                                | 6  |
| <b>Table S3-1</b> The atomic composition of Co <sub>x</sub> Ni <sub>y</sub> CH before OER derived from XPS.                                                                                                                                                     | 6  |
| <b>Table S3-2</b> The atomic composition of Co <sub>x</sub> Ni <sub>y</sub> CH after OER derived from XPS.                                                                                                                                                      | 6  |
| <b>Table S3-3</b> The atomic composition of Co <sub>1</sub> Ni <sub>6</sub> CH in various electrolytes derived from XPS.                                                                                                                                        | 6  |
| <b>Fig.S5</b> Fe 2p XPS spectra of Co <sub>1</sub> Ni <sub>6</sub> CH after OER test.                                                                                                                                                                           | 7  |
| <b>Table S4</b> Comparison of OER activities for some cobalt-nickel based catalysts in alkaline solution                                                                                                                                                        | 8  |
| <b>Fig.S6</b> Nyquist plots of these samples at the potential of 0.6 V vs. Hg/HgO.                                                                                                                                                                              | 9  |
| <b>Table S5</b> Related parameters for various electrodes before and after 1000 CV cycles                                                                                                                                                                       | 9  |
| <b>Fig.S7</b> CV curves of these samples in the potential range of 0.4-1.4 V vs. RHE.                                                                                                                                                                           | 9  |
| <b>Fig.S8</b> CV curves of these samples with various scan rates.                                                                                                                                                                                               | 10 |
| <b>Fig. S9</b> (a) Mass activity curves, and (b) overpotential curves for various Co <sub>x</sub> Ni <sub>y</sub> CH samples (solid lines represent samples before 1000 cycles, dash lines represent samples after 1000 cycles)                                 | 11 |
| <b>Fig. S10</b> (a)Polarization curves, and (b) Tafel curves for various Co <sub>x</sub> Ni <sub>y</sub> CH samples (solid lines represent samples before 1000 CV cycles, dash lines represent samples after 1000 CV cycles)                                    | 11 |
| <b>Fig.S11</b> (a) Overpotential at 10 mA/cm <sup>2</sup> in various electrolytes, and (b) plots showing the extraction of the Cdl for Co <sub>1</sub> Ni <sub>6</sub> CH in NaOH and Fe-free KOH electrolyte.                                                  | 12 |
| <b>Fig. S12</b> (a)Polarization curves, and (b) Tafel curves for Co <sub>1</sub> Ni <sub>6</sub> CH samples in KOH, NaOH, and Fe-free KOH electrolytes (solid lines represent samples before 1000 CV cycles, dash lines represent samples after 1000 CV cycles) | 12 |
| <b>Fig.S13</b> Nyquist plots of Co <sub>1</sub> Ni <sub>6</sub> CH in KOH, NaOH and Fe-free KOH electrolyte at the potential of                                                                                                                                 |    |

0.6 V vs. Hg/HgO.

13

**Table S6** Related parameters for Co<sub>1</sub>Ni<sub>6</sub>CH in various electrolytes before and after 1000 cycles. 13

**Fig. S14** Optimized structures of (a) NiOOH, (b) Co-NiOOH, (c) Fe-NiOOH, and (d) FeCo-NiOOH.

14

**Fig. S15** Partial density of state of (a) NiOOH, (b) Co-NiOOH, (c) Fe-NiOOH, and (d) FeCo-NiOOH.

15

**Table S1** The chemical components for the synthesis of electrocatalysts

| Sample                             | Ni(NO <sub>3</sub> ) <sub>2</sub> •6H <sub>2</sub> O/g | Co(NO <sub>3</sub> ) <sub>2</sub> •6H <sub>2</sub> O/g | NH <sub>4</sub> F/g | CO(NH <sub>2</sub> ) <sub>2</sub> /g | H <sub>2</sub> O/mL |
|------------------------------------|--------------------------------------------------------|--------------------------------------------------------|---------------------|--------------------------------------|---------------------|
| NiCH                               | 1.0905                                                 | ----                                                   | 0.2778              | 1.1261                               | 100                 |
| Co <sub>1</sub> Ni <sub>9</sub> CH | 0.9814                                                 | 0.1092                                                 | 0.2778              | 1.1261                               | 100                 |
| Co <sub>1</sub> Ni <sub>6</sub> CH | 0.9347                                                 | 0.1559                                                 | 0.2778              | 1.1261                               | 100                 |
| Co <sub>1</sub> Ni <sub>1</sub> CH | 0.5452                                                 | 0.5458                                                 | 0.2778              | 1.1261                               | 100                 |
| CoCH                               | ----                                                   | 1.0915                                                 | 0.2778              | 1.1261                               | 100                 |

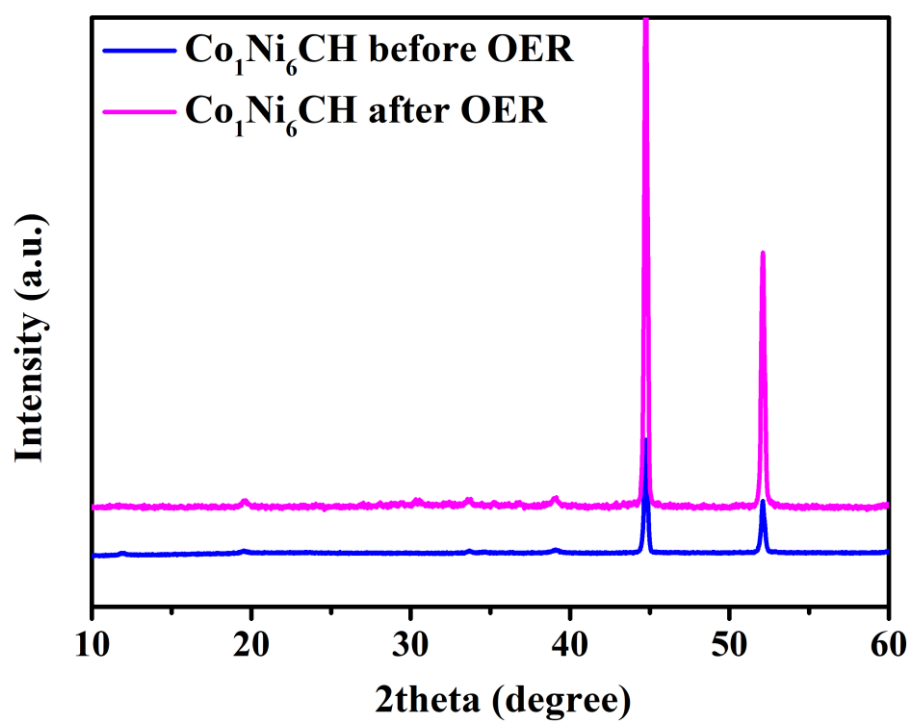**Fig. S1** XRD patterns of Co<sub>1</sub>Ni<sub>6</sub>CH before and after OER test.

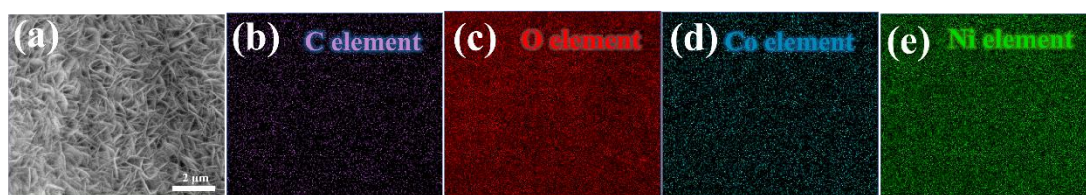

**Fig. S2** Elemental mapping images of  $\text{Co}_1\text{Ni}_6\text{CH}$ .

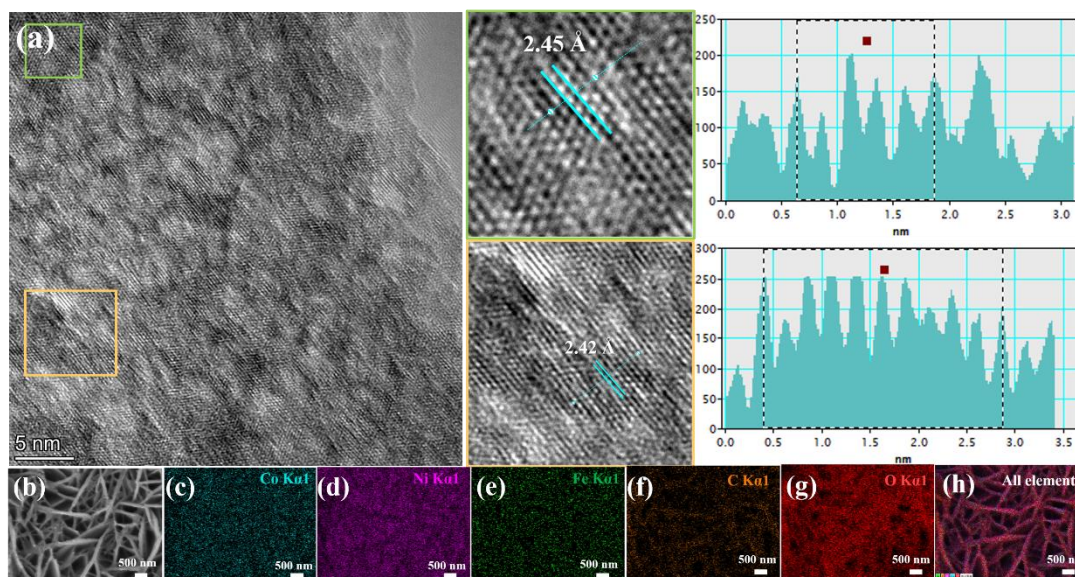

**Fig. S3** (a) Low-resolution TEM image, (b) high-resolution TEM image, and (c-g) elemental smart maps of  $\text{Co}_1\text{Ni}_6\text{CH}$  after OER test.

**Table S2** The elemental composition of  $\text{Co}_1\text{Ni}_6\text{CH}$  before and after OER in KOH electrolyte from EDS spectra

| Sample                                          | EDS spectra   |                 |                  |                  |                  |
|-------------------------------------------------|---------------|-----------------|------------------|------------------|------------------|
|                                                 | C<br>(atom.%) | O<br>(atomic %) | Co<br>(atomic %) | Ni<br>(atomic %) | Fe<br>(atomic %) |
| $\text{Co}_1\text{Ni}_6\text{CH}$<br>before OER | 15.51         | 64.14           | 2.46             | 17.89            | ----             |
| $\text{Co}_1\text{Ni}_6\text{CH}$ after<br>OER  | 8.34          | 67.99           | 1.49             | 22.08            | 0.10             |

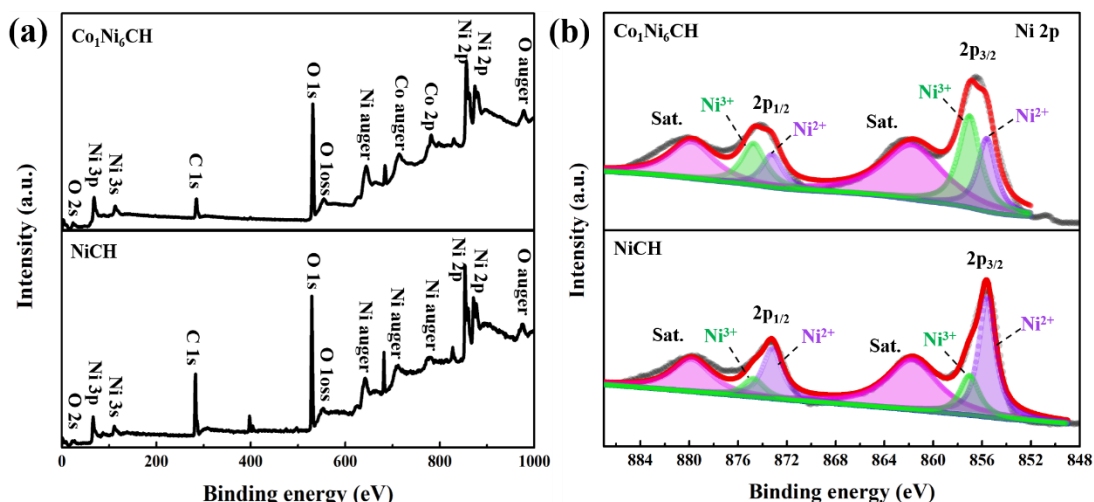

**Fig.S4** XPS spectra of NiCH and Co<sub>1</sub>Ni<sub>6</sub>CH.

(a) XPS survey spectra, and (b) Ni 2p.

**Table S3-1** The atomic composition of Co<sub>x</sub>Ni<sub>y</sub>CH before OER derived from XPS.

|        | NiCH  | Co <sub>1</sub> Ni <sub>1</sub> CH | Co <sub>1</sub> Ni <sub>6</sub> CH | Co <sub>1</sub> Ni <sub>9</sub> CH | CoCH  |
|--------|-------|------------------------------------|------------------------------------|------------------------------------|-------|
| C (%)  | 20.75 | 16.45                              | 17.51                              | 19.69                              | 24.87 |
| O (%)  | 50.96 | 51.29                              | 51.94                              | 50.85                              | 52.44 |
| Ni (%) | 28.29 | 24.28                              | 26.72                              | 25.92                              | ---   |
| Co (%) | ---   | 7.98                               | 3.83                               | 3.54                               | 22.69 |
| Co/Ni  | 0/1   | 0.33/1                             | 0.14/1                             | 0.09/1                             | 1/0   |

**Table S3-2** The atomic composition of Co<sub>x</sub>Ni<sub>y</sub>CH after OER derived from XPS.

|        | NiCH  | Co <sub>1</sub> Ni <sub>1</sub> CH | Co <sub>1</sub> Ni <sub>6</sub> CH | Co <sub>1</sub> Ni <sub>9</sub> CH | CoCH  |
|--------|-------|------------------------------------|------------------------------------|------------------------------------|-------|
| C (%)  | 27.81 | 22.97                              | 26.05                              | 21.61                              | 19.57 |
| O (%)  | 54.24 | 51.67                              | 49.85                              | 50.72                              | 57.39 |
| Ni (%) | 16.63 | 18.44                              | 19.84                              | 23.9                               | ---   |
| Co (%) | ---   | 5.72                               | 2.5                                | 1.83                               | 21.17 |
| Fe (%) | 1.33  | 1.2                                | 1.75                               | 1.85                               | 1.88  |
| Co/Ni  | 0/1   | 0.31/1                             | 0.13/1                             | 0.08/1                             | 1/0   |

**Table S3-3** The atomic composition of Co<sub>1</sub>Ni<sub>6</sub>CH in various electrolytes derived from XPS.

|        | KOH    | NaOH   | Fe-free KOH |
|--------|--------|--------|-------------|
| C (%)  | 26.05  | 32.37  | 26.48       |
| O (%)  | 49.85  | 51.29  | 53.61       |
| Ni (%) | 19.84  | 14.06  | 17.52       |
| Co (%) | 2.5    | 1.44   | 1.64        |
| Fe (%) | 1.75   | 0.84   | 0.76        |
| Co/Ni  | 0.13/1 | 0.10/1 | 0.09/1      |

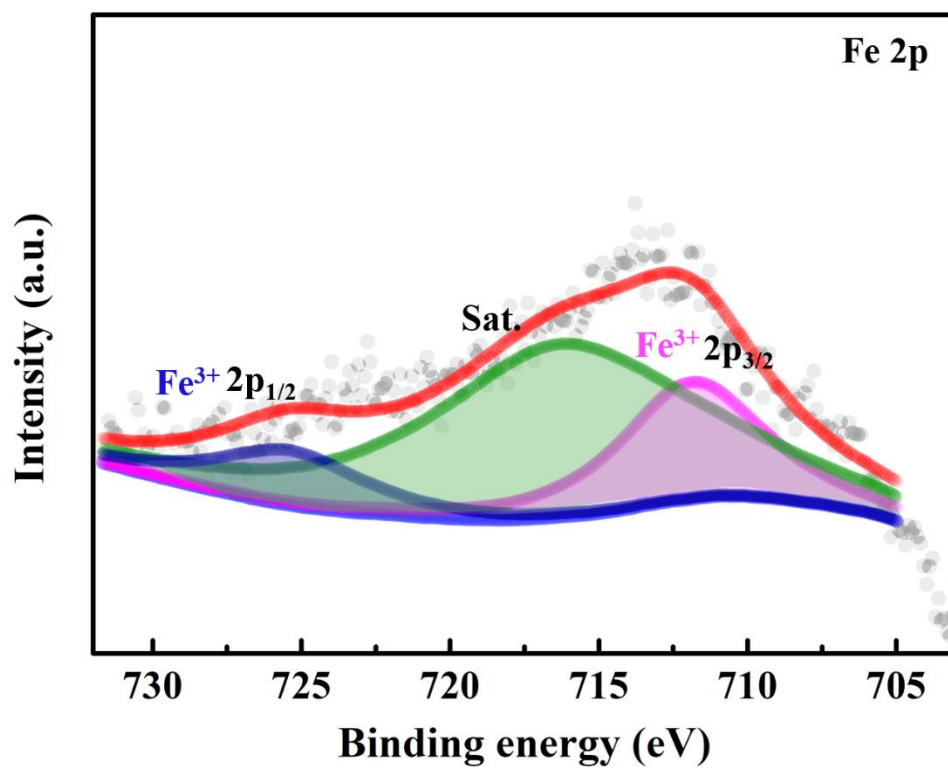

Fig.S5 Fe 2p XPS spectra of Co<sub>1</sub>Ni<sub>6</sub>CH after OER test.

**Table S4** Comparison of OER activities for some cobalt-nickel based catalysts in alkaline solution

| Catalyst                              | Electrolyte    | Overpotential                          | Tafel slope | Ref.             |
|---------------------------------------|----------------|----------------------------------------|-------------|------------------|
| <b>Co<sub>1</sub>Ni<sub>6</sub>CH</b> | <b>1 M KOH</b> | <b>256 mV (<math>\eta_{50}</math>)</b> | <b>51</b>   | <b>This Work</b> |
| <b>CoNi<sub>1.5</sub>P</b>            | 1 M KOH        | 278 mV ( $\eta_{10}$ )                 | 67          | [1]              |
| <b>NiCo<sub>2</sub>O HNS</b>          | 0.1 M KOH      | 362 mV ( $\eta_{10}$ )                 | 64.4        | [2]              |
| <b>Co<sub>2</sub>Ni<sub>1</sub>O</b>  | 1 M KOH        | 310 mV ( $\eta_{10}$ )                 | 57          | [3]              |
| <b>CoNiP-2</b>                        | 1 M KOH        | 277 mV ( $\eta_{10}$ )                 | 63.6        | [4]              |
| <b>CoNi<sub>2</sub>S<sub>4</sub></b>  | 1 M KOH        | 260 mV ( $\eta_{10}$ )                 | 40.1        | [5]              |
| <b>NiCoF-1,1</b>                      | 1 M KOH        | ~305 mV ( $\eta_{10}$ )                | 77          | [6]              |
| <b>NiCo-LDH</b>                       | 0.1 M KOH      | ~420 mV ( $\eta_{10}$ )                | 113         | [7]              |
| <b>CoNiSe</b>                         | 1 M KOH        | 380 mV ( $\eta_{100}$ )                | 110         | [8]              |
| <b>NiCoCH</b>                         | 1 M KOH        | 266 mV ( $\eta_{10}$ )                 | 44.8        | [9]              |
| <b>NiCoCHH</b>                        | 1 M KOH        | 238 mV ( $\eta_{10}$ )                 | 190         | [10]             |

Notice: HNS is hollow nanosponges, LDH is layered double hydroxide, CH is carbonate hydroxide, and CHH is Carbonate Hydroxide Hydrate.

### Reference

- [1] L.N. Zhou, L. Yu, C. Liu, Y.J. Li, Electrocatalytic activity sites for the oxygen evolution reaction on binary cobalt and nickel phosphides, *RSC Adv.*, 10 (2020) 39909-39915.
- [2] C.Z. Zhu, D. Wen, S. Leubner, M. Oschatz, W. Liu, M. Holzschuh, F. Simon, S. Kaskel, A. Eychmuller, Nickel cobalt oxide hollow nanosponges as advanced electrocatalysts for the oxygen evolution reaction, *Chem. Commun.*, 51 (2015) 7851-7854.
- [3] J. Zhao, X.R. Wang, X.J. Wang, Y.P. Li, X.D. Yang, G.D. Li, F.T. Li, Ultrathin porous nanosheet-assembled hollow cobalt nickel oxide microspheres with optimized compositions for efficient oxygen evolution reaction, *Inorg. Chem. Front.*, 5 (2018) 1886-1893.
- [4] L. Chai, S. Liu, S. Pei, C. Wang, Electrodeposited amorphous cobalt-nickel-phosphide-derived films as catalysts for electrochemical overall water splitting, *Chem. Eng. J.*, 420 (2021) 129686.
- [5] A. Sivanantham, P. Ganesan, S. Shanmugam, Hierarchical NiCo<sub>2</sub>S<sub>4</sub> Nanowire Arrays Supported on Ni Foam: An Efficient and Durable Bifunctional Electrocatalyst for Oxygen and Hydrogen Evolution Reactions, *Adv. Funct. Mater.*, 26 (2016) 4661-4672.
- [6] Y. Xue, Y. Wang, H. Liu, X. Yu, H. Xue, L. Feng, Electrochemical oxygen evolution reaction catalyzed by a novel nickel-cobalt-fluoride catalyst, *Chem. Commun.*, 54 (2018) 6204-6207.
- [7] J. Jiang, A. Zhang, L. Li, L. Ai, Nickel-cobalt layered double hydroxide nanosheets as high-performance electrocatalyst for oxygen evolution reaction, *J. Power Sour.*, 278 (2015) 445-451.
- [8] D.X. Liang, J.X. Mao, P. Liu, J.W. Li, J.Y. Yan, W.B. Song, In-situ doping of Co in nickel selenide nanoflower for robust electrocatalysis towards oxygen evolution, *Int. J. Hydrog. Energy*, 45 (2020) 27047-27055.
- [9] A. Karmakar, S.K. Srivastava, Transition-Metal-Substituted Cobalt Carbonate Hydroxide Nanostructures as Electrocatalysts in Alkaline Oxygen Evolution Reaction, *ACS Appl. Energy Mater.*, 3 (2020) 7335-7344.
- [10] K. Karthick, S. Subhashini, R. Kumar, S. Sethuram Markandaraj, M.M. Teepikha, S. Kundu, Cubic Nanostructures of Nickel-Cobalt Carbonate Hydroxide Hydrate as a High-Performance Oxygen Evolution Reaction Electrocatalyst in Alkaline and Near-Neutral Media, *Inorg. Chem.*, 59 (2020) 16690-16702.



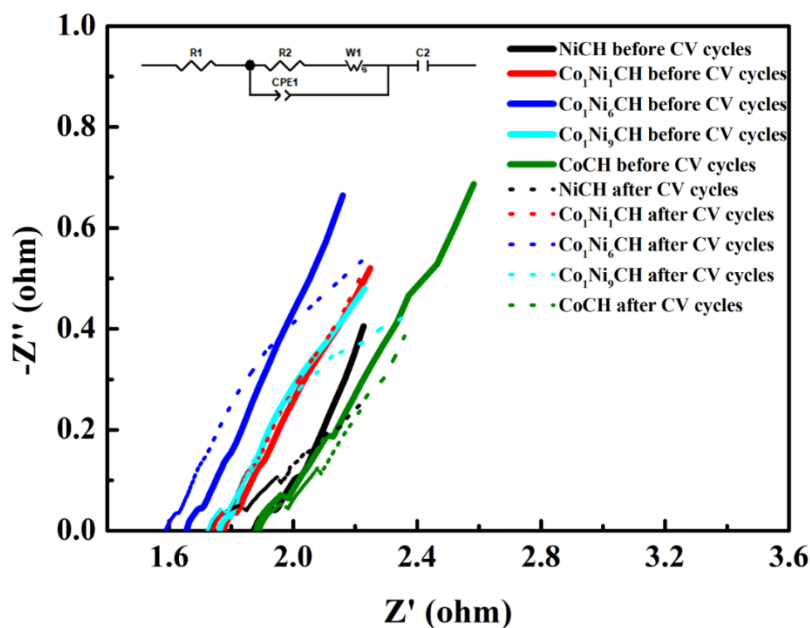

Fig.S6 Nyquist plots of these samples at the potential of 0.6 V vs. Hg/HgO.

Table S5 Related parameters for various electrodes before and after 1000 CV cycles

| Samples before CV cycles           | R1 ( $\Omega$ ) | R2 ( $\Omega$ ) | Samples after CV cycles            | R1 ( $\Omega$ ) | R2 ( $\Omega$ ) |
|------------------------------------|-----------------|-----------------|------------------------------------|-----------------|-----------------|
| NiCH                               | 1.863           | 0.580           | NiCH                               | 1.737           | 0.255           |
| Co <sub>1</sub> Ni <sub>1</sub> CH | 1.773           | 0.620           | Co <sub>1</sub> Ni <sub>1</sub> CH | 1.741           | 0.160           |
| Co <sub>1</sub> Ni <sub>6</sub> CH | 1.654           | 0.125           | Co <sub>1</sub> Ni <sub>6</sub> CH | 1.59            | 0.109           |
| Co <sub>1</sub> Ni <sub>9</sub> CH | 1.768           | 0.253           | Co <sub>1</sub> Ni <sub>9</sub> CH | 1.73            | 0.135           |
| CoCH                               | 2.00            | 0.685           | CoCH                               | 1.892           | 0.239           |

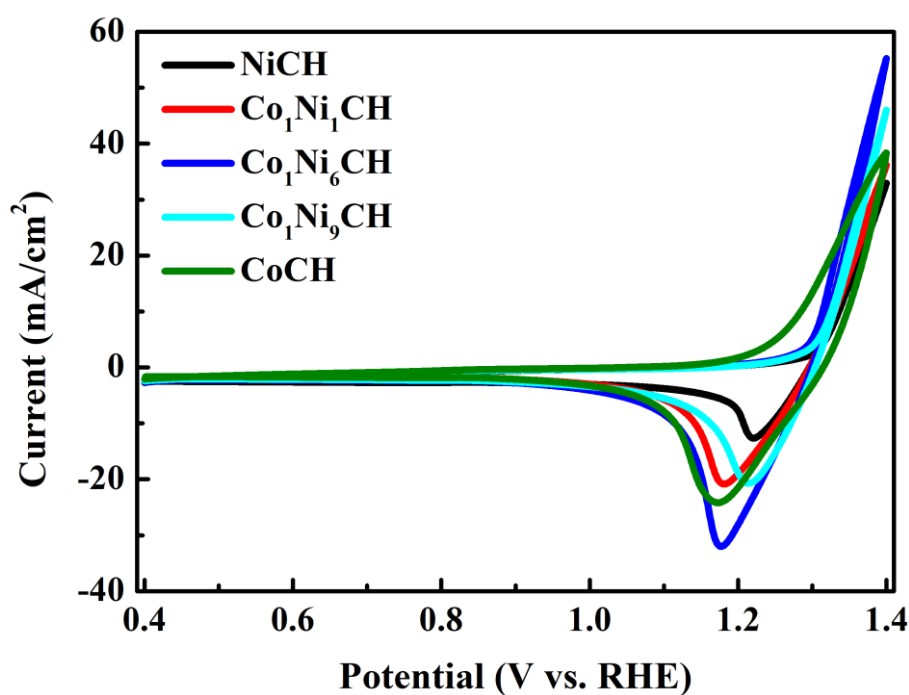

Fig.S7 CV curves of these samples in the potential range of 0.4-1.4 V vs. RHE.

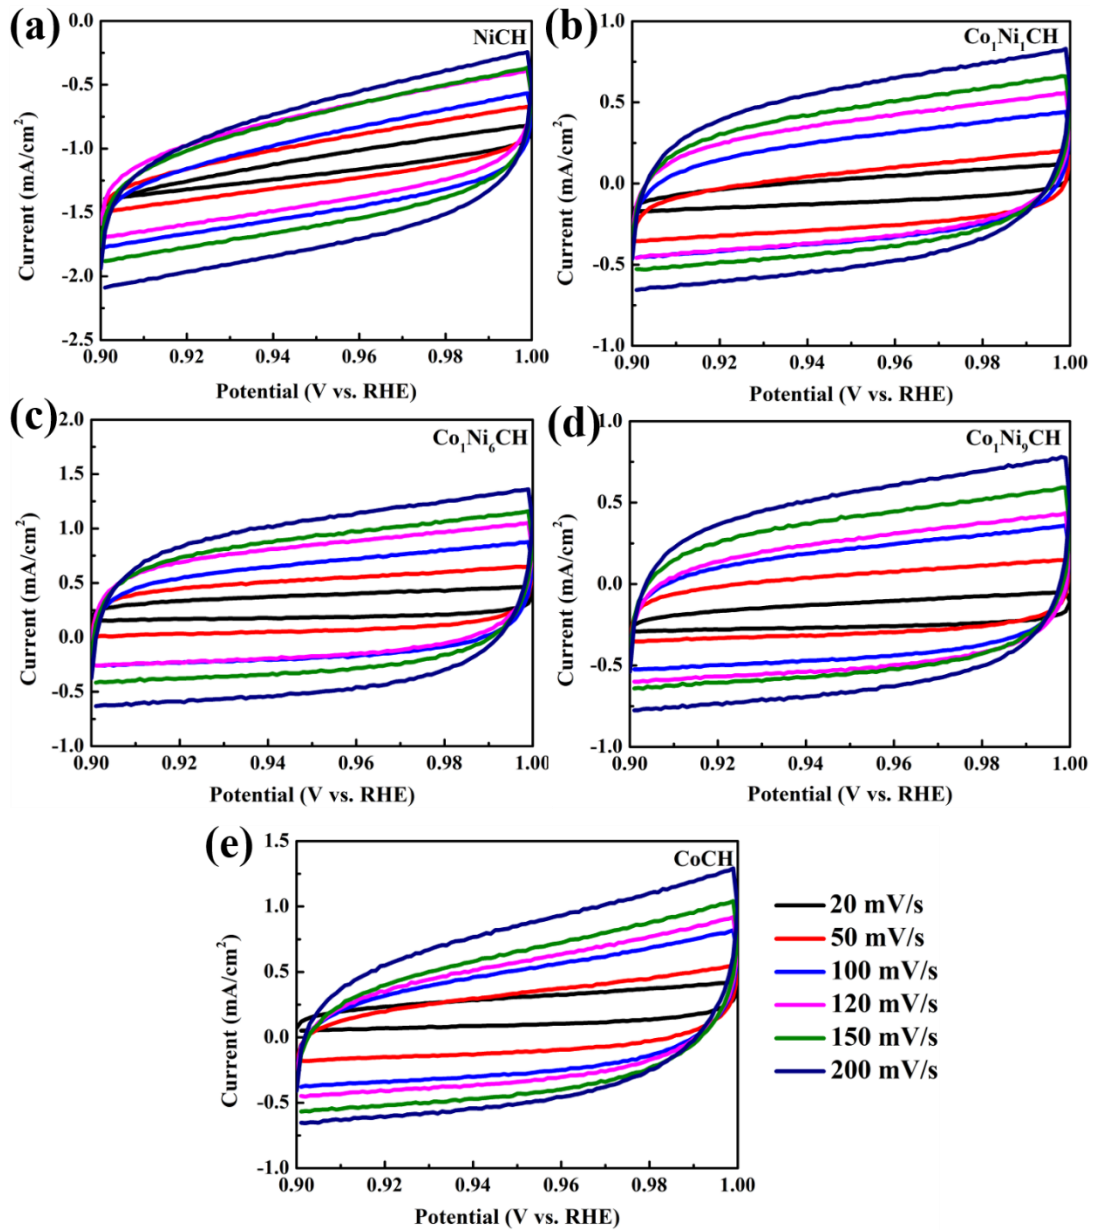

**Fig.S8** CV curves of these samples with various scan rates.

### Intrinsic activity calculation

1. The Turnover frequency (TOF) is defined as the number of O<sub>2</sub> molecules produced by each active site per second. It can be calculated as below:

$$TOF = \frac{Q}{4Fn} (s^{-1}) \quad \text{Eq S1}$$

Where Q is the total charge that passes through the circuit in 1 s ( $Q = It$ ,  $t = 1$  s), F is the Faraday constant ( $F = 96485.3$  C/mol), n is the number of moles of active sites. We assume that four electrons are required to give one O<sub>2</sub> molecule and 100% Faradaic efficiency were achieved. The mass loading of electrocatalysts in this work is about 1.4 mg. The electrocatalyst can be assumed as the formula of  $M_2(OH)_2CO_3 \cdot yH_2O$  (M is Ni,

Co, and Fe). Due to the partial phase transformation,  $\text{Ni}_2(\text{OH})_2\text{CO}_3 \cdot y\text{H}_2\text{O}$  is believed as the main existence. Thus,  $n$  can be obtained as below:

$$n = 2 \times \frac{1.4 \times 10^{-3}}{229.422} = 1.2 \times 10^{-5} \text{ mol} \quad \text{Eq S2}$$

In 1 M KOH, at overpotential = 250 mV, the OER currents are 5.6, 4.8, 32.4, 6.7, and 6.0 mA, respectively. The corresponding calculated TOF values are 0.0012, 0.0010, 0.0070, 0.0014, and 0.0013  $\text{s}^{-1}$ .

2. Roughness factor ( $R_f$ ) can be evaluated as below:

$$\text{ECSA} = \frac{C_{dl}}{C_s} \quad \text{Eq S3}$$

$$R_f = \frac{\text{ECSA}}{A_g} \quad \text{Eq S4}$$

Where  $C_{dl}$  is the double capacitance deduced from CV curves recorded in non-Faradic region,  $C_s$  exhibit the standard capacitance of atomically flat surface of the respective materials ( $C_s = 0.060 \text{ mF/cm}^2$ ). The active geometrical area of electrode is about  $1 \text{ cm}^2$ . The  $C_{dl}$  values from CV are 2.78, 2.68, 3.84, 3.00, and  $3.19 \text{ mF/cm}^2$ , respectively. Thus, the corresponding values of  $R_f$  are 46.33, 44.67, 64.00, 50.00, and 53.17.

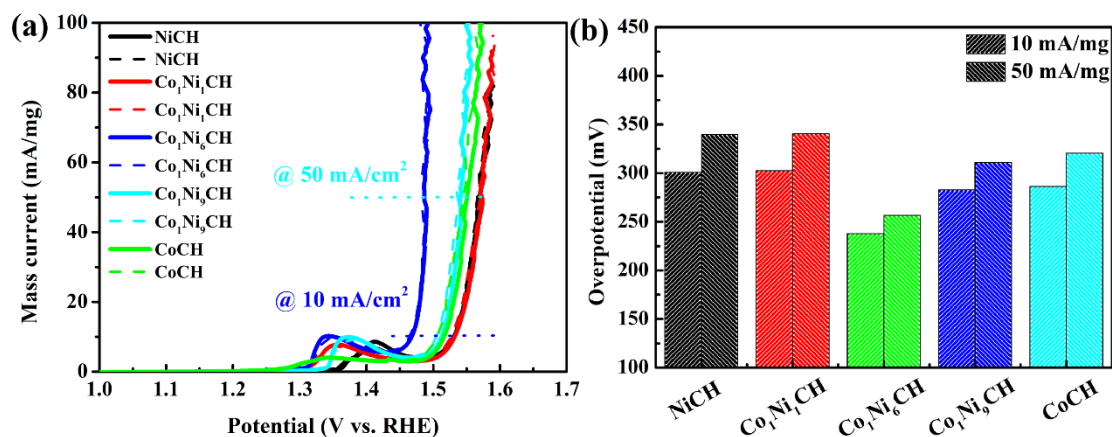

**Fig. S9** (a) Mass activity curves, and (b) overpotential curves for various  $\text{Co}_x\text{Ni}_y\text{CH}$  samples (solid lines represent samples before 1000 CV cycles, dash lines represent samples after 1000 CV cycles)

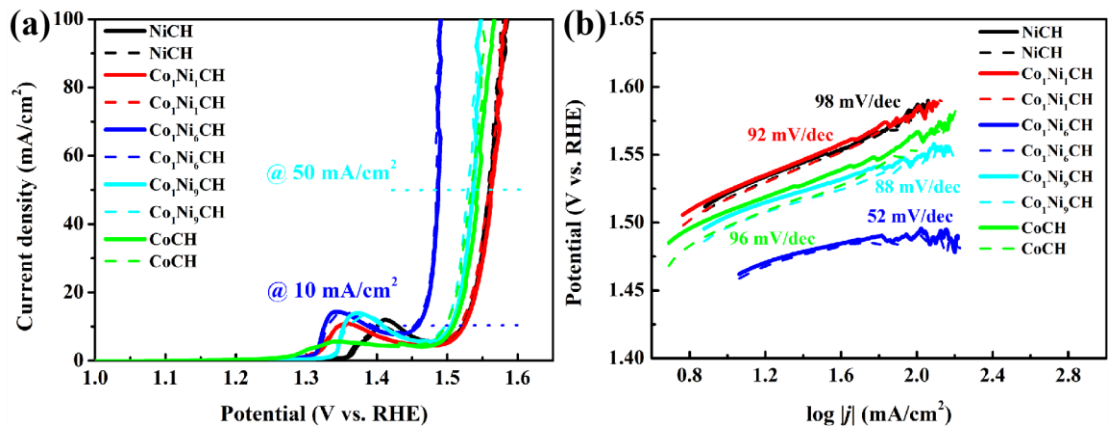

**Fig. S10** (a) Polarization curves, and (b) Tafel curves for various Co<sub>x</sub>Ni<sub>y</sub>CH samples (solid lines represent samples before 1000 CV cycles, dash lines represent samples after 1000 CV cycles)

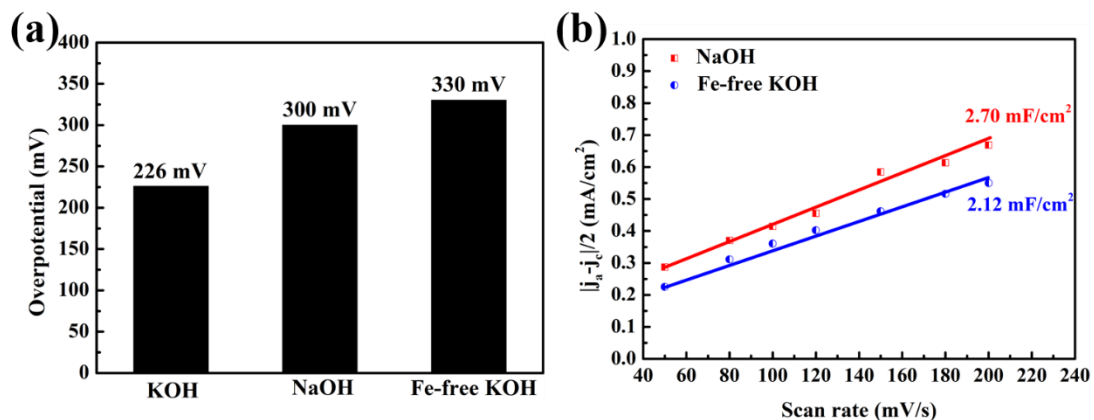

**Fig.S11** (a) Overpotential at 10 mA/cm<sup>2</sup> in various electrolytes, and (b) plots showing the extraction of the C<sub>dl</sub> for Co<sub>1</sub>Ni<sub>6</sub>CH in NaOH and Fe-free KOH electrolyte.

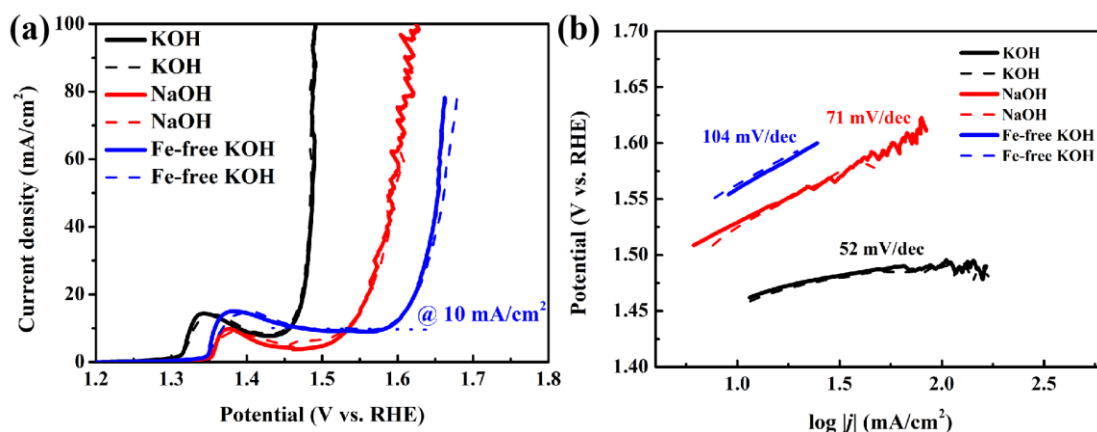

**Fig. S12** (a) Polarization curves, and (b) Tafel curves for Co<sub>1</sub>Ni<sub>6</sub>CH samples in KOH, NaOH, and Fe-free KOH electrolytes (solid lines represent samples before 1000 CV cycles, dash lines represent samples after 1000 CV cycles)

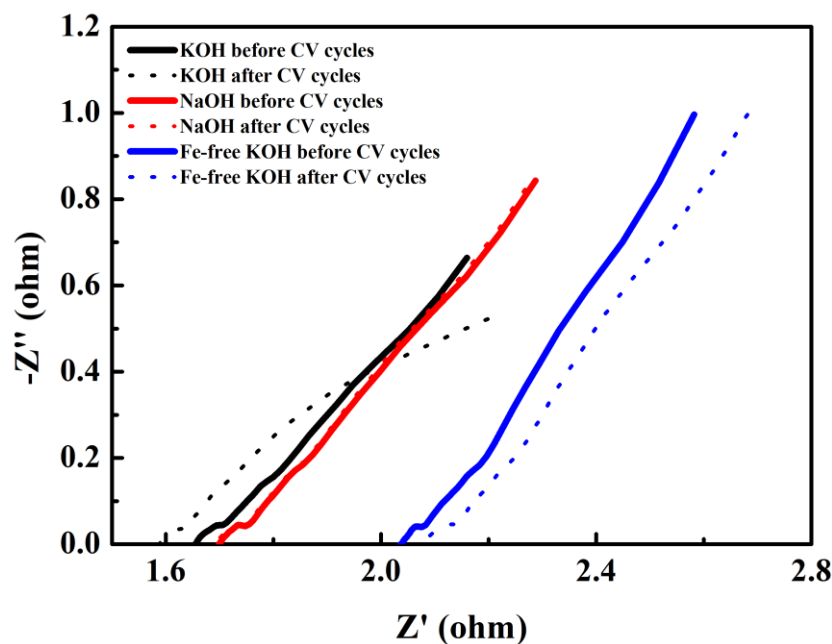

**Fig.S13** Nyquist plots of Co<sub>1</sub>Ni<sub>6</sub>CH in KOH, NaOH and Fe-free KOH electrolyte at the potential of 0.6 V vs. Hg/HgO.

Table S6 Related parameters for Co<sub>1</sub>Ni<sub>6</sub>CH in various electrolytes before and after 1000 CV cycles

| Samples before CV cycles | R1 ( $\Omega$ ) | R2 ( $\Omega$ ) | Samples after CV cycles | R1 ( $\Omega$ ) | R2 ( $\Omega$ ) |
|--------------------------|-----------------|-----------------|-------------------------|-----------------|-----------------|
| KOH                      | 1.654           | 0.125           | KOH                     | 1.59            | 0.109           |
| NaOH                     | 1.70            | 0.197           | NaOH                    | 1.69            | 0.192           |
| Fe-free KOH              | 2.038           | 0.143           | Fe-free KOH             | 2.079           | 0.173           |

### Calculation details

The Vienna Ab-initio Simulation Package (VASP) code using the projector augmented wave (PAW) method was used in the present density functional theory (DFT) calculations. The Generalized Gradient Approximation (GGA) of Perdew-Burke-Ernzerh (PBE) was used to describe the exchange and correlation energy density function. A slab model of the  $4 \times 4$  unit cell is employed, and a 20 Å vacuum layer along the z direction are adopted to eliminate the interactions between the slabs. A  $5 \times 5 \times 1$  k-point mesh is used, and a cutoff energy of 520 eV is taken for expanding the wave functions into a plane-wave basis. The convergence for energy is chosen as 10<sup>-5</sup> eV between two steps and the maximum Hellmann-Feynman force acting on each atom is less than 0.01 eV/Å upon ionic relaxation.

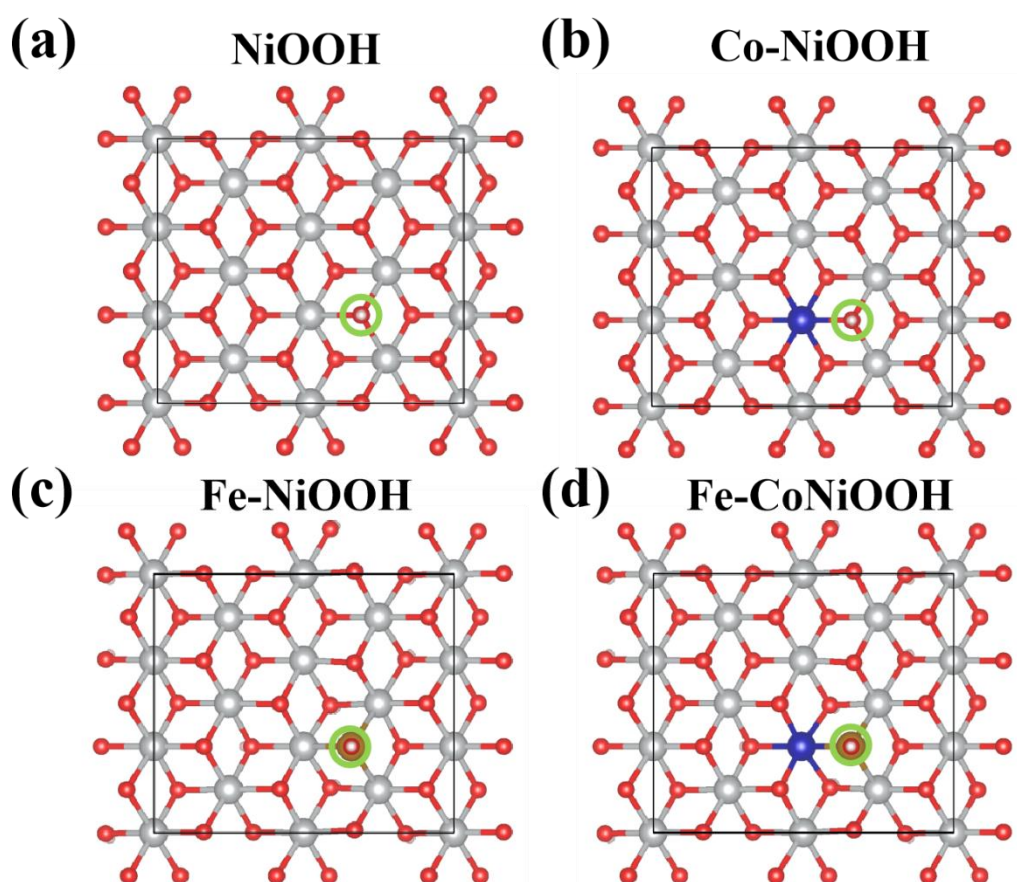

**Fig. S14** Optimized structures of (a) NiOOH, (b) Co-NiOOH, (c) Fe-NiOOH, and (d) FeCo-NiOOH.

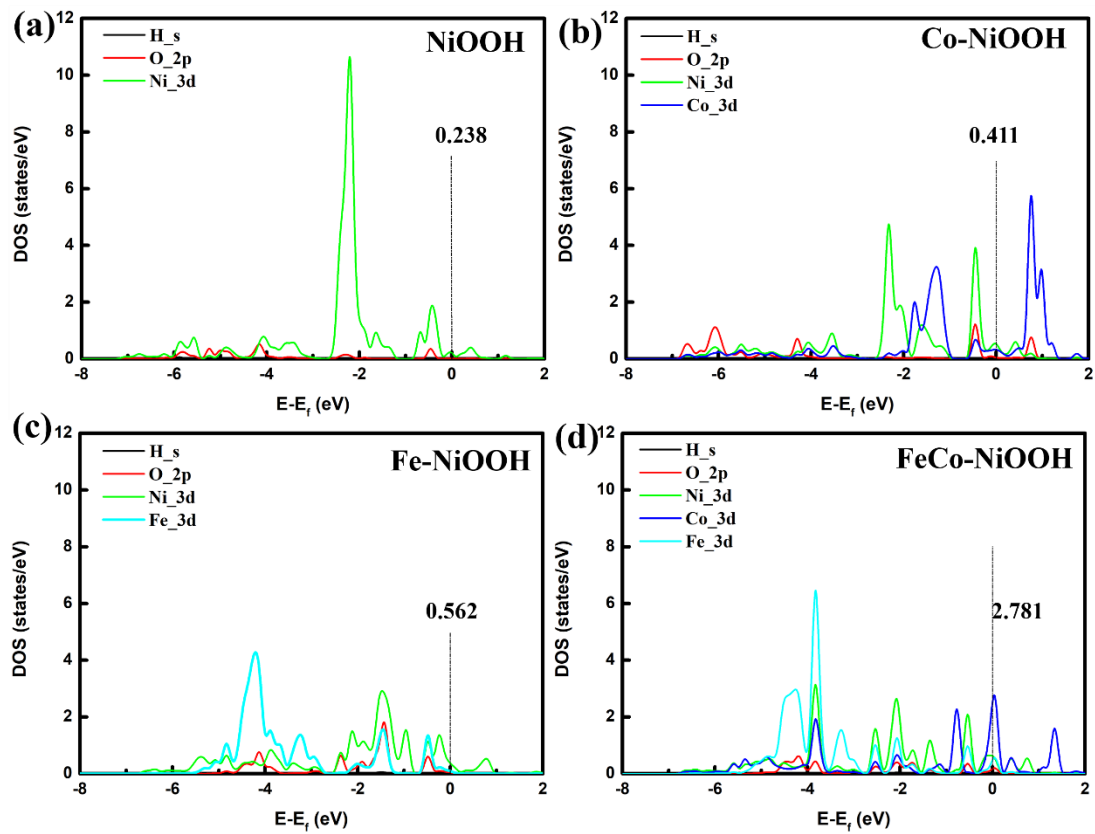

**Fig. S15** Partial density of state of (a) NiOOH, (b) Co-NiOOH, (c) Fe-NiOOH, and (d) FeCo-NiOOH.
